# Supplementary material for: Considering hormone-sensitive cancers as a single disease in the UK biobank reveals shared aetiology
Source: PubMed Central journal article supplement (PMC9213416; doi:10.1038/s42003-022-03554-y), 2022-06-21
Supplement: 42003_2022_3554_MOESM3_ESM.pdf [file 42003_2022_3554_MOESM3_ESM.pdf]

## Description of Additional Supplementary Files

**File name:** Supplementary Data 1

**Description:** The source data underlying the figures in the manuscript.
